# Supplementary material for: Quantifying the under-reporting of uncorrelated longitudal data: the genital warts example
Source: Springer Nature journal article supplement (doi:10.1186/s12874-020-01188-4), 2021-01-06
Supplement: MOESM1 [file 18740704]

## SUPPLEMENTARY MATERIAL

Accompanying the manuscript:

### Quantifying the under-reporting of uncorrelated longitudinal data: The genital warts example

David Moriña\*

Department of Econometrics, Statistics and Applied Economics, Riskcenter-IREA, Universitat de Barcelona (UB)

Centre de Recerca Matemàtica

E-mail: [dmorina@ub.edu](mailto:dmorina@ub.edu)

Amanda Fernández-Fontelo

Chair of Statistics, School of Business and Economics, Humboldt-Universität zu Berlin

E-mail: [fernanda@hu-berlin.de](mailto:fernanda@hu-berlin.de)

Alejandra Cabaña

Departament de Matemàtiques, Universitat Autònoma de Barcelona, Barcelona Graduate School of Mathematics (BGSMath)

E-mail: [acabana@mat.uab.cat](mailto:acabana@mat.uab.cat)

Pedro Puig

Departament de Matemàtiques, Universitat Autònoma de Barcelona, Barcelona Graduate School of Mathematics (BGSMath)

E-mail: [ppuig@mat.uab.cat](mailto:ppuig@mat.uab.cat)

Laura Monfil

Unit of Infections and Cancer - Information and Interventions (UNIC - I&I), Cancer Epidemiology Research Program (CERP), Catalan Institute of Oncology (ICO)-IDIBELL

E-mail: [lmonfil@iconcologia.net](mailto:lmonfil@iconcologia.net)

Maria Brotons

Unit of Infections and Cancer - Information and Interventions (UNIC - I&I), Cancer Epidemiology Research Program (CERP), Catalan Institute of Oncology (ICO)-IDIBELL

E-mail: [mbrotons@iconcologia.net](mailto:mbrotons@iconcologia.net)

Mireia Diaz

Unit of Infections and Cancer - Information and Interventions (UNIC - I&I), Cancer Epidemiology Research Program (CERP), Catalan Institute of Oncology (ICO)-IDIBELL

E-mail: [mireia@iconcologia.net](mailto:mireia@iconcologia.net)

\*[dmorina@ub.edu](mailto:dmorina@ub.edu)

### 1. Table S1. Under-reporting magnitude for each subpopulation by year

| Year           | Sex            | Age          | SIDIAP incidence (registered) | SIDIAP incidence (reconstructed) | Difference (%) |
|----------------|----------------|--------------|-------------------------------|----------------------------------|----------------|
| <b>2009</b>    | <b>Females</b> | <b>15-29</b> | 14.67                         | 19.63                            | 33.76%         |
| <b>2010</b>    |                |              | 17.78                         | 22.48                            | 26.41%         |
| <b>2011</b>    |                |              | 18.74                         | 23.14                            | 23.52%         |
| <b>2012</b>    |                |              | 19.04                         | 23.51                            | 23.46%         |
| <b>2013</b>    |                |              | 20.66                         | 23.68                            | 14.59%         |
| <b>2014</b>    |                |              | 21.57                         | 24.81                            | 15.04%         |
| <b>2015</b>    |                |              | 19.92                         | 24.61                            | 23.56%         |
| <b>2016</b>    |                |              | 19.63                         | 22.04                            | 12.27%         |
| <b>Average</b> |                |              | 19.00                         | 22.99                            | 20.97%         |
| <b>2009</b>    |                |              | <b>Females</b>                | <b>30-94</b>                     | 2.66           |
| <b>2010</b>    | 3.29           | 4.40         |                               |                                  | 33.76%         |
| <b>2011</b>    | 3.41           | 4.57         |                               |                                  | 33.76%         |
| <b>2012</b>    | 3.66           | 4.89         |                               |                                  | 33.76%         |
| <b>2013</b>    | 4.26           | 5.70         |                               |                                  | 33.76%         |
| <b>2014</b>    | 4.61           | 5.99         |                               |                                  | 30.10%         |
| <b>2015</b>    | 4.76           | 5.38         |                               |                                  | 13.04%         |
| <b>2016</b>    | 4.91           | 4.91         |                               |                                  | 0.00%          |
| <b>Average</b> | 3.95           | 4.93         |                               |                                  | 24.85%         |
| <b>2009</b>    | <b>Males</b>   | <b>15-29</b> |                               |                                  | 11.50          |
| <b>2010</b>    |                |              | 14.23                         | 18.52                            | 30.13%         |
| <b>2011</b>    |                |              | 15.36                         | 20.55                            | 33.76%         |
| <b>2012</b>    |                |              | 17.59                         | 21.04                            | 19.63%         |
| <b>2013</b>    |                |              | 21.59                         | 23.48                            | 8.76%          |
| <b>2014</b>    |                |              | 22.95                         | 22.95                            | 0.00%          |
| <b>2015</b>    |                |              | 22.40                         | 22.79                            | 1.75%          |
| <b>2016</b>    |                |              | 21.20                         | 21.63                            | 2.02%          |
| <b>Average</b> |                |              | 18.35                         | 20.79                            | 13.30%         |
| <b>2009</b>    |                |              | <b>Males</b>                  | <b>30-94</b>                     | 3.49           |
| <b>2010</b>    | 4.50           | 6.02         |                               |                                  | 33.76%         |
| <b>2011</b>    | 4.76           | 6.37         |                               |                                  | 33.76%         |
| <b>2012</b>    | 4.93           | 6.59         |                               |                                  | 33.76%         |
| <b>2013</b>    | 6.63           | 8.87         |                               |                                  | 33.76%         |
| <b>2014</b>    | 7.04           | 8.90         |                               |                                  | 26.46%         |
| <b>2015</b>    | 7.70           | 7.87         |                               |                                  | 2.24%          |
| <b>2016</b>    | 7.86           | 7.86         |                               |                                  | 0.00%          |
| <b>Average</b> | 5.86           | 7.14         |                               |                                  | 21.83%         |

## 2. Table S2. Estimated probabilities of membership (females)

| Age          | Underreported | Non underreported | Age          | Underreported | Non underreported |
|--------------|---------------|-------------------|--------------|---------------|-------------------|
|              | 1,000         | 0,000             |              | 0,960         | 0,040             |
|              | 0,999         | 0,001             |              | 0,954         | 0,046             |
|              | 0,932         | 0,068             |              | 0,934         | 0,066             |
|              | 1,000         | 0,000             |              | 0,939         | 0,061             |
|              | 0,995         | 0,005             |              | 0,915         | 0,085             |
|              | 0,962         | 0,038             |              | 0,925         | 0,075             |
|              | 0,974         | 0,026             |              | 0,921         | 0,079             |
|              | 0,996         | 0,004             |              | 0,946         | 0,054             |
|              | 0,997         | 0,003             |              | 0,920         | 0,080             |
|              | 0,998         | 0,002             |              | 0,939         | 0,061             |
|              | 0,961         | 0,039             |              | 0,942         | 0,058             |
|              | 1,000         | 0,000             |              | 0,934         | 0,066             |
|              | 0,924         | 0,076             |              | 0,905         | 0,095             |
|              | 0,000         | 1,000             |              | 0,896         | 0,104             |
|              | 0,986         | 0,014             |              | 0,893         | 0,107             |
|              | 0,987         | 0,013             |              | 0,914         | 0,086             |
|              | 0,779         | 0,221             |              | 0,915         | 0,085             |
|              | 0,999         | 0,001             |              | 0,915         | 0,085             |
|              | 0,016         | 0,984             |              | 0,914         | 0,086             |
|              | 0,999         | 0,001             |              | 0,902         | 0,098             |
|              | 0,995         | 0,005             |              | 0,899         | 0,101             |
|              | 0,969         | 0,031             |              | 0,914         | 0,086             |
|              | 0,971         | 0,029             |              | 0,904         | 0,096             |
| <b>15-29</b> | 0,998         | 0,002             | <b>30-94</b> | 0,910         | 0,090             |
|              | 0,999         | 0,001             |              | 0,899         | 0,101             |
|              | 0,945         | 0,055             |              | 0,898         | 0,102             |
|              | 0,018         | 0,982             |              | 0,879         | 0,121             |
|              | 0,416         | 0,584             |              | 0,881         | 0,119             |
|              | 0,000         | 1,000             |              | 0,865         | 0,135             |
|              | 0,856         | 0,144             |              | 0,889         | 0,111             |
|              | 0,930         | 0,070             |              | 0,893         | 0,107             |
|              | 0,999         | 0,001             |              | 0,886         | 0,114             |
|              | 0,628         | 0,372             |              | 0,847         | 0,153             |
|              | 0,978         | 0,022             |              | 0,869         | 0,131             |
|              | 0,998         | 0,002             |              | 0,871         | 0,129             |
|              | 1,000         | 0,000             |              | 0,885         | 0,115             |
|              | 0,999         | 0,001             |              | 0,877         | 0,123             |
|              | 0,987         | 0,013             |              | 0,855         | 0,145             |
|              | 0,988         | 0,012             |              | 0,854         | 0,146             |
|              | 0,989         | 0,011             |              | 0,856         | 0,144             |
|              | 0,017         | 0,983             |              | 0,806         | 0,194             |
|              | 0,998         | 0,002             |              | 0,829         | 0,171             |
|              | 0,000         | 1,000             |              | 0,813         | 0,187             |
|              | 0,982         | 0,018             |              | 0,854         | 0,146             |
|              | 0,983         | 0,017             |              | 0,837         | 0,163             |
|              | 0,038         | 0,962             |              | 0,793         | 0,207             |
|              | 0,771         | 0,229             |              | 0,815         | 0,185             |

SUPPLEMENTARY MATERIAL: Quantifying the under-reporting of uncorrelated longitudinal data: The genital warts example. David Moriña, Amanda Fernández-Fontelo, Alejandra Cabaña, Pedro Puig, Laura Monfil, Maria Brotons and Mireia Diaz

|       |       |       |       |
|-------|-------|-------|-------|
| 1,000 | 0,000 | 0,838 | 0,162 |
| 0,039 | 0,961 | 0,793 | 0,207 |
| 0,948 | 0,052 | 0,783 | 0,217 |
| 0,003 | 0,997 | 0,796 | 0,204 |
| 0,001 | 0,999 | 0,692 | 0,308 |
| 0,998 | 0,002 | 0,767 | 0,233 |
| 0,993 | 0,007 | 0,774 | 0,226 |
| 0,006 | 0,994 | 0,714 | 0,286 |
| 0,998 | 0,002 | 0,775 | 0,225 |
| 0,997 | 0,003 | 0,709 | 0,291 |
| 0,000 | 1,000 | 0,713 | 0,287 |
| 0,244 | 0,756 | 0,745 | 0,255 |
| 0,975 | 0,025 | 0,764 | 0,236 |
| 0,000 | 1,000 | 0,703 | 0,297 |
| 0,000 | 1,000 | 0,688 | 0,312 |
| 0,088 | 0,912 | 0,699 | 0,301 |
| 0,960 | 0,040 | 0,638 | 0,362 |
| 0,485 | 0,515 | 0,526 | 0,474 |
| 0,766 | 0,234 | 0,659 | 0,341 |
| 0,122 | 0,878 | 0,599 | 0,401 |
| 0,997 | 0,003 | 0,676 | 0,324 |
| 0,952 | 0,048 | 0,675 | 0,325 |
| 0,000 | 1,000 | 0,450 | 0,550 |
| 0,947 | 0,053 | 0,554 | 0,446 |
| 0,617 | 0,383 | 0,652 | 0,348 |
| 0,957 | 0,043 | 0,574 | 0,426 |
| 0,030 | 0,970 | 0,549 | 0,451 |
| 0,017 | 0,983 | 0,579 | 0,421 |
| 0,948 | 0,052 | 0,524 | 0,476 |
| 0,845 | 0,155 | 0,394 | 0,606 |
| 0,969 | 0,031 | 0,430 | 0,570 |
| 0,000 | 1,000 | 0,479 | 0,521 |
| 0,949 | 0,051 | 0,532 | 0,468 |
| 0,985 | 0,015 | 0,485 | 0,515 |
| 0,996 | 0,004 | 0,423 | 0,577 |
| 0,872 | 0,128 | 0,350 | 0,650 |
| 0,899 | 0,101 | 0,443 | 0,557 |
| 0,928 | 0,072 | 0,432 | 0,568 |
| 0,238 | 0,762 | 0,356 | 0,644 |
| 0,986 | 0,014 | 0,295 | 0,705 |
| 0,135 | 0,865 | 0,250 | 0,750 |
| 0,012 | 0,988 | 0,346 | 0,654 |
| 0,001 | 0,999 | 0,261 | 0,739 |
| 0,288 | 0,712 | 0,321 | 0,679 |
| 0,997 | 0,003 | 0,349 | 0,651 |
| 0,321 | 0,679 | 0,214 | 0,786 |
| 0,584 | 0,416 | 0,246 | 0,754 |
| 0,008 | 0,992 | 0,225 | 0,775 |
| 0,994 | 0,006 | 0,299 | 0,701 |

---

### 3. Table S3. Estimated probabilities of membership (males)

| Age          | Underreported | Non underreported | Age          | Underreported | Non underreported |
|--------------|---------------|-------------------|--------------|---------------|-------------------|
|              | 0,999         | 0,001             |              | 0,968         | 0,032             |
|              | 0,999         | 0,001             |              | 0,966         | 0,034             |
|              | 0,992         | 0,008             |              | 0,951         | 0,049             |
|              | 0,998         | 0,002             |              | 0,950         | 0,050             |
|              | 0,999         | 0,001             |              | 0,937         | 0,063             |
|              | 0,999         | 0,001             |              | 0,947         | 0,053             |
|              | 0,986         | 0,014             |              | 0,905         | 0,095             |
|              | 0,997         | 0,003             |              | 0,949         | 0,051             |
|              | 0,997         | 0,003             |              | 0,935         | 0,065             |
|              | 0,993         | 0,007             |              | 0,943         | 0,057             |
|              | 0,918         | 0,082             |              | 0,951         | 0,049             |
|              | 0,999         | 0,001             |              | 0,955         | 0,045             |
|              | 0,998         | 0,002             |              | 0,937         | 0,063             |
|              | 0,997         | 0,003             |              | 0,936         | 0,064             |
|              | 0,989         | 0,011             |              | 0,914         | 0,086             |
|              | 0,999         | 0,001             |              | 0,924         | 0,076             |
|              | 0,567         | 0,433             |              | 0,906         | 0,094             |
|              | 0,998         | 0,002             |              | 0,915         | 0,085             |
|              | 0,985         | 0,015             |              | 0,933         | 0,067             |
|              | 0,991         | 0,009             |              | 0,938         | 0,062             |
|              | 0,999         | 0,001             |              | 0,907         | 0,093             |
|              | 0,992         | 0,008             |              | 0,921         | 0,079             |
|              | 0,465         | 0,535             |              | 0,913         | 0,087             |
| <b>15-29</b> | 0,999         | 0,001             | <b>30-94</b> | 0,931         | 0,069             |
|              | 0,997         | 0,003             |              | 0,917         | 0,083             |
|              | 0,986         | 0,014             |              | 0,904         | 0,096             |
|              | 0,995         | 0,005             |              | 0,914         | 0,086             |
|              | 1,000         | 0,000             |              | 0,924         | 0,076             |
|              | 0,558         | 0,442             |              | 0,822         | 0,178             |
|              | 0,986         | 0,014             |              | 0,904         | 0,096             |
|              | 0,951         | 0,049             |              | 0,883         | 0,117             |
|              | 0,999         | 0,001             |              | 0,925         | 0,075             |
|              | 0,709         | 0,291             |              | 0,886         | 0,114             |
|              | 0,723         | 0,277             |              | 0,915         | 0,085             |
|              | 0,992         | 0,008             |              | 0,900         | 0,100             |
|              | 0,999         | 0,001             |              | 0,921         | 0,079             |
|              | 0,999         | 0,001             |              | 0,899         | 0,101             |
|              | 0,988         | 0,012             |              | 0,892         | 0,108             |
|              | 0,508         | 0,492             |              | 0,861         | 0,139             |
|              | 1,000         | 0,000             |              | 0,884         | 0,116             |
|              | 0,007         | 0,993             |              | 0,852         | 0,148             |
|              | 0,145         | 0,855             |              | 0,878         | 0,122             |
|              | 0,048         | 0,952             |              | 0,886         | 0,114             |
|              | 0,964         | 0,036             |              | 0,903         | 0,097             |
|              | 0,998         | 0,002             |              | 0,863         | 0,137             |
|              | 0,000         | 1,000             |              | 0,834         | 0,166             |
|              | 0,941         | 0,059             |              | 0,891         | 0,109             |

SUPPLEMENTARY MATERIAL: Quantifying the under-reporting of uncorrelated longitudinal data: The genital warts example. David Moriña, Amanda Fernández-Fontelo, Alejandra Cabaña, Pedro Puig, Laura Monfil, Maria Brotons and Mireia Diaz

|       |       |       |       |
|-------|-------|-------|-------|
| 0,998 | 0,002 | 0,893 | 0,107 |
| 0,000 | 1,000 | 0,567 | 0,433 |
| 0,988 | 0,012 | 0,795 | 0,205 |
| 0,001 | 0,999 | 0,763 | 0,237 |
| 0,000 | 1,000 | 0,725 | 0,275 |
| 0,000 | 1,000 | 0,606 | 0,394 |
| 0,002 | 0,998 | 0,808 | 0,192 |
| 0,000 | 1,000 | 0,548 | 0,452 |
| 0,718 | 0,282 | 0,799 | 0,201 |
| 0,910 | 0,090 | 0,797 | 0,203 |
| 0,000 | 1,000 | 0,518 | 0,482 |
| 0,006 | 0,994 | 0,783 | 0,217 |
| 0,998 | 0,002 | 0,830 | 0,170 |
| 0,306 | 0,694 | 0,735 | 0,265 |
| 0,007 | 0,993 | 0,638 | 0,362 |
| 0,070 | 0,930 | 0,520 | 0,480 |
| 0,000 | 1,000 | 0,717 | 0,283 |
| 0,007 | 0,993 | 0,272 | 0,728 |
| 0,000 | 1,000 | 0,715 | 0,285 |
| 0,000 | 1,000 | 0,619 | 0,381 |
| 0,443 | 0,557 | 0,719 | 0,281 |
| 0,000 | 1,000 | 0,569 | 0,431 |
| 0,000 | 1,000 | 0,182 | 0,818 |
| 0,167 | 0,833 | 0,616 | 0,384 |
| 0,003 | 0,997 | 0,634 | 0,366 |
| 0,038 | 0,962 | 0,390 | 0,610 |
| 0,005 | 0,995 | 0,395 | 0,605 |
| 0,000 | 1,000 | 0,208 | 0,792 |
| 0,223 | 0,777 | 0,456 | 0,544 |
| 0,000 | 1,000 | 0,286 | 0,714 |
| 0,000 | 1,000 | 0,451 | 0,549 |
| 0,000 | 1,000 | 0,185 | 0,815 |
| 0,996 | 0,004 | 0,547 | 0,453 |
| 0,013 | 0,987 | 0,223 | 0,777 |
| 0,000 | 1,000 | 0,280 | 0,720 |
| 0,000 | 1,000 | 0,252 | 0,748 |
| 0,000 | 1,000 | 0,441 | 0,559 |
| 0,983 | 0,017 | 0,237 | 0,763 |
| 0,000 | 1,000 | 0,079 | 0,921 |
| 0,000 | 1,000 | 0,102 | 0,898 |
| 0,000 | 1,000 | 0,140 | 0,860 |
| 0,323 | 0,677 | 0,106 | 0,894 |
| 0,006 | 0,994 | 0,153 | 0,847 |
| 0,146 | 0,854 | 0,220 | 0,780 |
| 0,091 | 0,909 | 0,363 | 0,637 |
| 0,000 | 1,000 | 0,042 | 0,958 |
| 0,000 | 1,000 | 0,211 | 0,789 |
| 0,000 | 1,000 | 0,099 | 0,901 |
| 0,162 | 0,838 | 0,377 | 0,623 |

---

## 4. R code for the analysis

### 4.1. Log-likelihood function

```
llh <- function(pars, data, covars)
{
  loglik <- 0
  for (i in 1:length(data))
  {
    logit.w <- pars[1]+pars[2]*covars[i, 1]
    w <- exp(logit.w)/(1+exp(logit.w))
    logit.q <- pars[11]
    q <- exp(logit.q)/(1+exp(logit.q))
    loglik <- loglik + log(w*dnorm(data[i], mean=(pars[3]+pars[4]*covars[i,
1]+pars[5]*covars[i, 2]+pars[6]*covars[i, 3]+pars[7]*covars[i, 4]+
pars[8]*covars[i, 5]+pars[9]*covars[i,
6]),
sd=pars[10]) +
(1-w)*dnorm(data[i], mean=(pars[3]+pars[4]*covars[i,
1]+pars[5]*covars[i, 2]+pars[6]*covars[i, 3]+pars[7]*covars[i, 4]+
pars[8]*covars[i,
5]+pars[9]*covars[i, 6])/q,
sd=pars[10]/q))
  }
  return((-1)*loglik)
}
```

### 4.2. Main analysis

```
library(mixtools)

source("R/llh_covars.R") ### (-) log-likelihood function

### Read the data
load("Data/data_main.RData")

### Covariates matrix
t <- rep(seq(1, 96), 4)/96
pr3$inter <- as.numeric(pr3$age)*as.numeric(pr3$sexe)
sint <- sin(2*pi*t/3)
cost <- cos(2*pi*t/3)
covars <- cbind(t, pr3$age, pr3$sexe, pr3$inter, sint, cost)

### Direct estimation via mixtools
w0 <- 0.7
q0 <- 0.5
prova <- regmixEM(pr3$incid, covars, lambda=c(w0, (1-w0)),
beta=matrix(c(mean(pr3$incid), 0, 0, 0, 0, 0, mean(pr3$incid)/q0, 0, 0,
0, 0, 0, 0), ncol=2, nrow=ncol(covars)+1),
sigma=c(sd(pr3$incid), sd(pr3$incid)/q0),
k=2, addintercept=TRUE, epsilon=1e-16, maxit=10000)

### Initial values for covariates from linear regression model
linmod <- lm(pr3$incid~covars[, 1]+covars[, 2]+covars[, 3]+covars[, 4]+covars[, 5]+covars[,
6])

### Estimates, standard errors and confidence intervals for w and q
max.llh <- nlm(f=llh, p=c(log(prova$lambda[which(prova$beta[1,]==min(prova$beta[1,]))]/(1-
prova$lambda[which(prova$beta[1,]==min(prova$beta[1,]))])),
-0.5, linmod$coefficients,
prova$sigma[which(prova$beta[1,]==min(prova$beta[1,]))],
log((prova$beta[1,which(prova$beta[1,]==min(prova$beta[1,]))])/
prova$beta[1,which(prova$beta[1,]==max(prova$beta[1,]))]))/(1-
prova$beta[1,which(prova$beta[1,]==min(prova$beta[1,]))]))/
prova$beta[1,which(prova$beta[1,]==max(prova$beta[1,]))])),
data=pr3$incid, covars=covars, hessian=TRUE)

q <- exp(max.llh$estimate[11])/(1+exp(max.llh$estimate[11]))

sigma <- solve(max.llh$hessian)
lim.inf95_1 <- max.llh$estimate[1] - qnorm(0.975)*sqrt(diag(sigma))[1] #intercept w
lim.sup95_1 <- max.llh$estimate[1] + qnorm(0.975)*sqrt(diag(sigma))[1] #intercept w
lim.inf95_2 <- max.llh$estimate[2] - qnorm(0.975)*sqrt(diag(sigma))[2] #time w
lim.sup95_2 <- max.llh$estimate[2] + qnorm(0.975)*sqrt(diag(sigma))[2] #time w
```

SUPPLEMENTARY MATERIAL: Quantifying the under-reporting of uncorrelated longitudinal data: The genital warts example. David Morriña, Amanda Fernández-Fontelo, Alejandra Cabaña, Pedro Puig, Laura Monfil, Maria Brotons and Mireia Diaz

```

lim.inf95_3 <- max.llh$estimate[3] - qnorm(0.975)*sqrt(diag(sigma))[3] #intercept mean
lim.sup95_3 <- max.llh$estimate[3] + qnorm(0.975)*sqrt(diag(sigma))[3] #intercept mean
lim.inf95_4 <- max.llh$estimate[4] - qnorm(0.975)*sqrt(diag(sigma))[4] #t
lim.sup95_4 <- max.llh$estimate[4] + qnorm(0.975)*sqrt(diag(sigma))[4] #t
lim.inf95_5 <- max.llh$estimate[5] - qnorm(0.975)*sqrt(diag(sigma))[5] #age
lim.sup95_5 <- max.llh$estimate[5] + qnorm(0.975)*sqrt(diag(sigma))[5] #age
lim.inf95_6 <- max.llh$estimate[6] - qnorm(0.975)*sqrt(diag(sigma))[6] #sex
lim.sup95_6 <- max.llh$estimate[6] + qnorm(0.975)*sqrt(diag(sigma))[6] #sex
lim.inf95_7 <- max.llh$estimate[7] - qnorm(0.975)*sqrt(diag(sigma))[7] #interaction age*sex
lim.sup95_7 <- max.llh$estimate[7] + qnorm(0.975)*sqrt(diag(sigma))[7] #interaction age*sex
lim.inf95_8 <- max.llh$estimate[8] - qnorm(0.975)*sqrt(diag(sigma))[8] #sin
lim.sup95_8 <- max.llh$estimate[8] + qnorm(0.975)*sqrt(diag(sigma))[8] #sin
lim.inf95_9 <- max.llh$estimate[9] - qnorm(0.975)*sqrt(diag(sigma))[9] #cos
lim.sup95_9 <- max.llh$estimate[9] + qnorm(0.975)*sqrt(diag(sigma))[9] #cos
lim.inf95_10 <- max.llh$estimate[10] - qnorm(0.975)*sqrt(diag(sigma))[10] #sd
lim.sup95_10 <- max.llh$estimate[10] + qnorm(0.975)*sqrt(diag(sigma))[10] #sd
lim.inf95_11 <- max.llh$estimate[11] - qnorm(0.975)*sqrt(diag(sigma))[11] #logit(q)
lim.sup95_11 <- max.llh$estimate[11] + qnorm(0.975)*sqrt(diag(sigma))[11] #logit(q)

### Confidence interval for q
exp(lim.inf95_11)/(1+exp(lim.inf95_11)); exp(lim.sup95_11)/(1+exp(lim.sup95_11))

### Reconstruction of the hidden processes
# a. Females, 15-29 years old
gw.women1 <- pr3[pr3$sexe==0 & pr3$age==0, ]
### Calculation of the posterior probabilities
post <- matrix(nrow=96, ncol=2)
w <- vector()
for (i in 1:96)
{
  w[i] <-
exp(max.llh$estimate[1]+max.llh$estimate[2]*i/96)/(1+exp(max.llh$estimate[1]+max.llh$estimate[
2]*i/96))
  post[i, 1] <- w[i]*dnorm(gw.women1$incid[i],
mean=(max.llh$estimate[3]+max.llh$estimate[4]*i/96+max.llh$estimate[8]*covars[i, 5]+
max.llh$estimate[9]*covars[i, 6]),
sd=max.llh$estimate[10])/
(w[i]*dnorm(gw.women1$incid[i],
mean=(max.llh$estimate[3]+max.llh$estimate[4]*i/96+max.llh$estimate[8]*covars[i, 5]+
max.llh$estimate[9]*covars[i, 6]),
sd=max.llh$estimate[10])+
(1-w[i])*dnorm(gw.women1$incid[i],
mean=(max.llh$estimate[3]+max.llh$estimate[4]*i/96+max.llh$estimate[8]*covars[i, 5]+
max.llh$estimate[9]*covars[i, 6])/q,
sd=max.llh$estimate[10]/q))
  post[i, 2] <- (1-w[i])*dnorm(gw.women1$incid[i],
mean=(max.llh$estimate[3]+max.llh$estimate[4]*i/96+max.llh$estimate[8]*covars[i, 5]+
max.llh$estimate[9]*covars[i, 6])/q,
sd=max.llh$estimate[10]/q)/
(w[i]*dnorm(gw.women1$incid[i],
mean=(max.llh$estimate[3]+max.llh$estimate[4]*i/96+max.llh$estimate[8]*covars[i, 5]+
max.llh$estimate[9]*covars[i, 6]),
sd=max.llh$estimate[10])+
(1-w[i])*dnorm(gw.women1$incid[i],
mean=(max.llh$estimate[3]+max.llh$estimate[4]*i/96+max.llh$estimate[8]*covars[i, 5]+
max.llh$estimate[9]*covars[i, 6])/q,
sd=max.llh$estimate[10]/q))
}
xrec <- ifelse(post[, 2] > 0.5, gw.women1$incid, gw.women1$incid/q)

mean(gw.women1$incid); mean(xrec)
(mean(xrec)-mean(gw.women1$incid))/mean(gw.women1$incid)*100

par(mfrow=c(2, 2))
gw.dones.ts <- ts(gw.women1$incid, start=c(2009, 1), end=c(2016, 12), freq=12)
ts.plot(gw.dones.ts, ylim=c(9, 32), ylab="Incidence x 100,000", main="Women 15-29 years old")
lines(seq(2009, 2016.99, 1/12), xrec, col="red", lty=2)

# b. Females, over 30 years old
gw.women2 <- pr3[pr3$sexe==0 & pr3$age==1, ]
### Calculation of the posterior probabilities
post <- matrix(nrow=96, ncol=2)
w <- vector()
for (i in 1:96)
{
  w[i] <-
exp(max.llh$estimate[1]+max.llh$estimate[2]*i/96)/(1+exp(max.llh$estimate[1]+max.llh$estimate[
2]*i/96))

```



SUPPLEMENTARY MATERIAL: Quantifying the under-reporting of uncorrelated longitudinal data: The genital warts example. David Morfiña, Amanda Fernández-Fontelo, Alejandra Cabaña, Pedro Puig, Laura Monfil, Maria Brotons and Mireia Diaz

```

    post[i, 1] <- w[i]*dnorm(gw.women2$incid[i],
mean=(max.llh$estimate[3]+max.llh$estimate[4]*i/96+max.llh$estimate[5]+
max.llh$estimate[8]*covars[i,
5]+max.llh$estimate[9]*covars[i, 6]), sd=max.llh$estimate[10])/
(w[i]*dnorm(gw.women2$incid[i],
mean=(max.llh$estimate[3]+max.llh$estimate[4]*i/96+max.llh$estimate[5]+max.llh$estimate[8]*cov
ars[i, 5]+
max.llh$estimate[9]*covars[i, 6]),
sd=max.llh$estimate[10])+
(1-w[i])*dnorm(gw.women2$incid[i],
mean=(max.llh$estimate[3]+max.llh$estimate[4]*i/96+max.llh$estimate[5]+max.llh$estimate[8]*cov
ars[i, 5]+
max.llh$estimate[9]*covars[i, 6])/q,
sd=max.llh$estimate[10]/q))
    post[i, 2] <- (1-w[i])*dnorm(gw.women2$incid[i],
mean=(max.llh$estimate[3]+max.llh$estimate[4]*i/96+max.llh$estimate[5]+max.llh$estimate[8]*cov
ars[i, 5]+
max.llh$estimate[9]*covars[i,
6])/q, sd=max.llh$estimate[10]/q)/
(w[i]*dnorm(gw.women2$incid[i],
mean=(max.llh$estimate[3]+max.llh$estimate[4]*i/96+max.llh$estimate[5]+max.llh$estimate[8]*cov
ars[i, 5]+
max.llh$estimate[9]*covars[i, 6]),
sd=max.llh$estimate[10])+
(1-w[i])*dnorm(gw.women2$incid[i],
mean=(max.llh$estimate[3]+max.llh$estimate[4]*i/96+max.llh$estimate[5]+max.llh$estimate[8]*cov
ars[i, 5]+
max.llh$estimate[9]*covars[i, 6])/q,
sd=max.llh$estimate[10]/q))
}
xrec <- ifelse(post[,2] > 0.5, gw.women2$incid, gw.women2$incid/q)

mean(gw.women2$incid); mean(xrec)
(mean(xrec)-mean(gw.women2$incid))/mean(gw.women2$incid)*100

gw.dones.ts <- ts(gw.women2$incid, start=c(2009, 1), end=c(2016, 12), freq=12)
ts.plot(gw.dones.ts, ylim=c(1, 8), ylab="Incidence x 100,000", main="Women 30-94 years old")
lines(seq(2009, 2016.99, 1/12), xrec, col="red", lty=2)

# c. Males, 15-29 years old
gw.men1 <- pr3[pr3$sexe==1 & pr3$age==0, ]
### Calculation of the posterior probabilities
post <- matrix(nrow=96, ncol=2)
w <- vector()
for (i in 1:96)
{
  w[i] <-
exp(max.llh$estimate[1]+max.llh$estimate[2]*i/96)/(1+exp(max.llh$estimate[1]+max.llh$estimate[
2]*i/96))
  post[i, 1] <- w[i]*dnorm(gw.men1$incid[i],
mean=(max.llh$estimate[3]+max.llh$estimate[4]*i/96+max.llh$estimate[6]+
max.llh$estimate[8]*covars[i,
5]+max.llh$estimate[9]*covars[i, 6]), sd=max.llh$estimate[10])/
(w[i]*dnorm(gw.men1$incid[i],
mean=(max.llh$estimate[3]+max.llh$estimate[4]*i/96+max.llh$estimate[6]+max.llh$estimate[8]*cov
ars[i, 5]+
max.llh$estimate[9]*covars[i, 6]),
sd=max.llh$estimate[10])+
(1-w[i])*dnorm(gw.men1$incid[i],
mean=(max.llh$estimate[3]+max.llh$estimate[4]*i/96+max.llh$estimate[6]+max.llh$estimate[8]*cov
ars[i, 5]+
max.llh$estimate[9]*covars[i, 6])/q,
sd=max.llh$estimate[10]/q))
  post[i, 2] <- (1-w[i])*dnorm(gw.men1$incid[i],
mean=(max.llh$estimate[3]+max.llh$estimate[4]*i/96+max.llh$estimate[6]+max.llh$estimate[8]*cov
ars[i, 5]+
max.llh$estimate[9]*covars[i,
6])/q, sd=max.llh$estimate[10]/q)/
(w[i]*dnorm(gw.men1$incid[i],
mean=(max.llh$estimate[3]+max.llh$estimate[4]*i/96+max.llh$estimate[6]+max.llh$estimate[8]*cov
ars[i, 5]+
max.llh$estimate[9]*covars[i, 6]),
sd=max.llh$estimate[10])+
(1-w[i])*dnorm(gw.men1$incid[i],
mean=(max.llh$estimate[3]+max.llh$estimate[4]*i/96+max.llh$estimate[6]+max.llh$estimate[8]*cov
ars[i, 5]+
max.llh$estimate[9]*covars[i, 6])/q,
sd=max.llh$estimate[10]/q))
}

```

SUPPLEMENTARY MATERIAL: Quantifying the under-reporting of uncorrelated longitudinal data: The genital warts example. David Morfiña, Amanda Fernández-Fontelo, Alejandra Cabaña, Pedro Puig, Laura Monfil, Maria Brotons and Mireia Diaz

```

}
xrec <- ifelse(post[,2] > 0.5, gw.men1$incid, gw.men1$incid/q)

mean(gw.men1$incid); mean(xrec)
(mean(xrec)-mean(gw.men1$incid))/mean(gw.men1$incid)*100

gw.homes.ts <- ts(gw.men1$incid, start=c(2009, 1), end=c(2016, 12), freq=12)
ts.plot(gw.homes.ts, ylim=c(4, 32), ylab="Incidence x 100,000", main="Men 15-29 years old")
lines(seq(2009, 2016.99, 1/12), xrec, col="red", lty=2)

# d. Males, 30-94 years old
gw.men2 <- pr3[pr3$sexe==1 & pr3$age==1, ]
### Calculation of the posterior probabilities
post <- matrix(nrow=96, ncol=2)
w <- vector()
for (i in 1:96)
{
  w[i] <-
exp(max.llh$estimate[1]+max.llh$estimate[2]*i/96)/(1+exp(max.llh$estimate[1]+max.llh$estimate[2]*i/96))
  post[i, 1] <- w[i]*dnorm(gw.men2$incid[i],
mean=(max.llh$estimate[3]+max.llh$estimate[4]*i/96+max.llh$estimate[5]+max.llh$estimate[6]+
max.llh$estimate[7]+max.llh$estimate[8]*covars[i, 5]+max.llh$estimate[9]*covars[i, 6]),
sd=max.llh$estimate[10])/
(w[i]*dnorm(gw.men2$incid[i],
mean=(max.llh$estimate[3]+max.llh$estimate[4]*i/96+max.llh$estimate[5]+max.llh$estimate[6]+
max.llh$estimate[7]+max.llh$estimate[8]*covars[i, 5]+max.llh$estimate[9]*covars[i, 6]),
sd=max.llh$estimate[10])+
(1-w[i])*dnorm(gw.men2$incid[i],
mean=(max.llh$estimate[3]+max.llh$estimate[4]*i/96+max.llh$estimate[5]+max.llh$estimate[6]+
max.llh$estimate[7]+max.llh$estimate[8]*covars[i, 5]+max.llh$estimate[9]*covars[i, 6])/q,
sd=max.llh$estimate[10]/q))
  post[i, 2] <- (1-w[i])*dnorm(gw.men2$incid[i],
mean=(max.llh$estimate[3]+max.llh$estimate[4]*i/96+max.llh$estimate[5]+max.llh$estimate[6]+
max.llh$estimate[7]+max.llh$estimate[8]*covars[i, 5]+max.llh$estimate[9]*covars[i, 6])/q,
sd=max.llh$estimate[10]/q)/
(w[i]*dnorm(gw.men2$incid[i],
mean=(max.llh$estimate[3]+max.llh$estimate[4]*i/96+max.llh$estimate[5]+max.llh$estimate[6]+
max.llh$estimate[7]+max.llh$estimate[8]*covars[i, 5]+max.llh$estimate[9]*covars[i, 6]),
sd=max.llh$estimate[10])+
(1-w[i])*dnorm(gw.men2$incid[i],
mean=(max.llh$estimate[3]+max.llh$estimate[4]*i/96+max.llh$estimate[5]+max.llh$estimate[6]+
max.llh$estimate[7]+max.llh$estimate[8]*covars[i, 5]+max.llh$estimate[9]*covars[i, 6])/q,
sd=max.llh$estimate[10]/q))
}
xrec <- ifelse(post[,2] > 0.5, gw.men2$incid, gw.men2$incid/q)

mean(gw.men2$incid); mean(xrec)
(mean(xrec)-mean(gw.men2$incid))/mean(gw.men2$incid)*100

gw.homes.ts <- ts(gw.men2$incid, start=c(2009, 1), end=c(2016, 12), freq=12)
ts.plot(gw.homes.ts, ylim=c(1, 12), ylab="Incidence x 100,000", main="Men 30-94 years old")
lines(seq(2009, 2016.99, 1/12), xrec, col="red", lty=2)

```

### 4.3. Validation

```

library(mixtools)
library(ggplot2)
library(gridExtra)

source("R/llh_covars.R") ### (-) log-likelihood function

### Read the data
load("Data/data_main.RData")

### Covariates matrix
t <- rep(seq(1, 96), 4)/96
pr3$inter <- as.numeric(pr3$age)*as.numeric(pr3$sexe)
sint <- sin(2*pi*t/3)
cost <- cos(2*pi*t/3)
covars <- cbind(t, pr3$age, pr3$sexe, pr3$inter, sint, cost)

### Direct estimation via mixtools
w0 <- 0.7

```

SUPPLEMENTARY MATERIAL: Quantifying the under-reporting of uncorrelated longitudinal data: The genital warts example. David Morfiña, Amanda Fernández-Fontelo, Alejandra Cabaña, Pedro Puig, Laura Monfil, Maria Brotons and Mireia Diaz

```

q0      <- 0.5
prova   <- regmixEM(pr3$incid, covars, lambda=c(w0, (1-w0)),
                  beta=matrix(c(mean(pr3$incid), 0, 0, 0, 0, 0, 0, 0, 0, 0, mean(pr3$incid)/q0, 0, 0,
0, 0, 0, 0), ncol=2, nrow=ncol(covars)+1),
                  sigma=c(sd(pr3$incid), sd(pr3$incid)/q0),
                  k=2, addintercept=TRUE, epsilon=1e-16, maxit=10000)

### Initial values for covariates from linear regression model
linmod <- lm(pr3$incid~covars[, 1]+covars[, 2]+covars[, 3]+covars[, 4]+covars[, 5]+covars[,
6])

### Estimates, standard errors and confidence intervals for w and q
max.llh <- nlm(f=llh, p=c(log(prova$lambda[which(prova$beta[1,]==min(prova$beta[1,]))]/(1-
prova$lambda[which(prova$beta[1,]==min(prova$beta[1,]))])),
              -0.5, linmod$coefficients,
prova$sigma[which(prova$beta[1,]==min(prova$beta[1,]))],
              log((prova$beta[1,which(prova$beta[1,]==min(prova$beta[1,]))])/
prova$beta[1,which(prova$beta[1,]==max(prova$beta[1,]))])/(1-
prova$beta[1,which(prova$beta[1,]==max(prova$beta[1,]))])),
              data=pr3$incid, covars=covars, hessian=TRUE)

q <- exp(max.llh$estimate[11])/(1+exp(max.llh$estimate[11]))

### Global validation (residuals analysis)
y_est <- vector()
w      <- vector()
for (i in 1:384)
{
  j <- (i %% 96)/96
  if (j == 0) j <- 1
  w[i] <-
exp(max.llh$estimate[1]+max.llh$estimate[2]*j)/(1+exp(max.llh$estimate[1]+max.llh$estimate[2]*
j))
  m <- max.llh$estimate[3]+max.llh$estimate[4]*j+max.llh$estimate[5]*pr3$age[i]+
max.llh$estimate[6]*pr3$sexe[i]+max.llh$estimate[7]*pr3$inter[i]+max.llh$estimate[8]*covars[i,
5]+
  max.llh$estimate[9]*covars[i, 6]
  y_est[i] <- w[i]*m+(1-w[i])*m/q
}

y_est_agg_temp <- data.frame(t=rep(seq(1:96), 4), sexe=c(rep(0, 192), rep(1, 192)),
                             edat=c(rep(0, 96), rep(1, 96), rep(0, 96), rep(1, 96)), y_est)
tw             <- sum(unique(pr3$Pob))
y_est_agg     <- aggregate(y_est_agg_temp$y_est, by=list(y_est_agg_temp$t), FUN=sum)
y_agg        <- aggregate(pr3$incid, by=list(pr3$mes_any_problema), FUN=sum)
y_est_agg$x[1:12] <- y_est_agg$x[1:12] *sum(unique(pr3$Pob[pr3$Year==2009]))/tw
y_est_agg$x[13:24] <- y_est_agg$x[13:24] *sum(unique(pr3$Pob[pr3$Year==2010]))/tw
y_est_agg$x[25:36] <- y_est_agg$x[25:36] *sum(unique(pr3$Pob[pr3$Year==2011]))/tw
y_est_agg$x[37:48] <- y_est_agg$x[37:48] *sum(unique(pr3$Pob[pr3$Year==2012]))/tw
y_est_agg$x[49:60] <- y_est_agg$x[49:60] *sum(unique(pr3$Pob[pr3$Year==2013]))/tw
y_est_agg$x[61:72] <- y_est_agg$x[61:72] *sum(unique(pr3$Pob[pr3$Year==2014]))/tw
y_est_agg$x[73:84] <- y_est_agg$x[73:84] *sum(unique(pr3$Pob[pr3$Year==2015]))/tw
y_est_agg$x[85:96] <- y_est_agg$x[85:96] *sum(unique(pr3$Pob[pr3$Year==2016]))/tw

y_agg$x[1:12] <- y_agg$x[1:12] *sum(unique(pr3$Pob[pr3$Year==2009]))/tw
y_agg$x[13:24] <- y_agg$x[13:24] *sum(unique(pr3$Pob[pr3$Year==2010]))/tw
y_agg$x[25:36] <- y_agg$x[25:36] *sum(unique(pr3$Pob[pr3$Year==2011]))/tw
y_agg$x[37:48] <- y_agg$x[37:48] *sum(unique(pr3$Pob[pr3$Year==2012]))/tw
y_agg$x[49:60] <- y_agg$x[49:60] *sum(unique(pr3$Pob[pr3$Year==2013]))/tw
y_agg$x[61:72] <- y_agg$x[61:72] *sum(unique(pr3$Pob[pr3$Year==2014]))/tw
y_agg$x[73:84] <- y_agg$x[73:84] *sum(unique(pr3$Pob[pr3$Year==2015]))/tw
y_agg$x[85:96] <- y_agg$x[85:96] *sum(unique(pr3$Pob[pr3$Year==2016]))/tw

### Residuals
resid <- y_est_agg$x-y_agg$x

### ACF and PACF
bacf <- acf(resid, lag.max = 10, plot = FALSE)
bacfdf <- with(bacf[1:10], data.frame(lag, acf))
conf.level <- 0.95
ciline <- qnorm((1 - conf.level)/2)/sqrt(length(y_agg$x))
q1 <- ggplot(data = bacfdf, mapping = aes(x = as.integer(lag), y = acf)) +
  geom_hline(aes(yintercept = 0)) + geom_hline(aes(yintercept = ciline), linetype=2) +
  geom_hline(aes(yintercept = -ciline), linetype=2)+

```

SUPPLEMENTARY MATERIAL: Quantifying the under-reporting of uncorrelated longitudinal data: The genital warts example. David Morióna, Amanda Fernández-Fontelo, Alejandra Cabaña, Pedro Puig, Laura Monfil, Maria Brotons and Mireia Diaz

```

geom_segment(mapping = aes(xend = lag, yend = 0)) + ylab("") + xlab("Lag") + ggtitle("ACF")
+ theme(plot.title = element_text(hjust = 0.5))
bacf <- pacf(resid, lag.max = 10, plot = FALSE)
bacfdf <- with(bacf, data.frame(lag, acf))
ciline <- qnorm((1 - conf.level)/2)/sqrt(length(y_agg$x))
q2 <- ggplot(data = bacfdf, mapping = aes(x = as.integer(lag), y = acf)) +
  geom_hline(aes(yintercept = 0)) + geom_hline(aes(yintercept = ciline), linetype=2) +
  geom_hline(aes(yintercept = -ciline), linetype=2) +
  geom_segment(mapping = aes(xend = lag, yend = 0)) + ylab("") + xlab("Lag") + ggtitle("PACF")
+ theme(plot.title = element_text(hjust = 0.5))
grid.arrange(q1, q2, ncol=2)

```

#### 4.4. Table 3 generation

```

### Construction of Table 3
library(mixtools)
source("R/llh_covars.R")

### Read the data
load("Data/data_CAT.RData")

### Covariates matrix
t <- rep(seq(1, 96), 4)/96
pr4$inter <- as.numeric(pr4$age)*as.numeric(pr4$sexe)
sint <- sin(2*pi*t/3)
cost <- cos(2*pi*t/3)
covars <- cbind(t, pr4$age, pr4$sexe, pr4$inter, sint, cost)

### Direct estimation via mixtools
w0 <- 0.7
q0 <- 0.5
prova <- regmixEM(pr4$incid, covars, lambda=c(w0, (1-w0)),
  beta=matrix(c(mean(pr4$incid), 0, 0, 0, 0, 0, 0, 0, mean(pr4$incid)/q0, 0, 0,
0, 0, 0, 0), ncol=2, nrow=ncol(covars)+1),
  sigma=c(sd(pr4$incid), sd(pr4$incid)/q0),
  k=2, addintercept=TRUE, epsilon=1e-16, maxit=10000)

### Initial values for covariates from linear regression model
linmod <- lm(pr4$incid~covars[, 1]+covars[, 2]+covars[, 3]+covars[, 4]+covars[, 5]+covars[,
6])

### Estimates, standard errors and confidence intervals for w and q
max.llh <- nlm(f=llh, p=c(log(prova$lambda[which(prova$beta[1,]==min(prova$beta[1,]))]/(1-
prova$lambda[which(prova$beta[1,]==min(prova$beta[1,]))])),
  -0.5, linmod$coefficients,
prova$sigma[which(prova$beta[1,]==min(prova$beta[1,]))],
  log((prova$beta[1,which(prova$beta[1,]==min(prova$beta[1,]))])/
prova$beta[1,which(prova$beta[1,]==max(prova$beta[1,]))]))/(1-
prova$beta[1,which(prova$beta[1,]==min(prova$beta[1,]))])/
prova$beta[1,which(prova$beta[1,]==max(prova$beta[1,]))])),
  data=pr4$incid, covars=covars, hessian=TRUE)

q <- exp(max.llh$estimate[11])/(1+exp(max.llh$estimate[11]))

### Women 15-29
gw.women1 <- pr4[pr4$sexe==0 & pr4$age==0, ]
### Calculation of the posterior probabilities
post <- matrix(nrow=96, ncol=2)
w <- vector()
for (i in 1:96)
{
  w[i] <-
exp(max.llh$estimate[1]+max.llh$estimate[2]*i/96)/(1+exp(max.llh$estimate[1]+max.llh$estimate[
2]*i/96))
  post[i, 1] <- w[i]*dnorm(gw.women1$incid[i],
mean=(max.llh$estimate[3]+max.llh$estimate[4]*i/96+max.llh$estimate[8]*covars[i, 5]+
max.llh$estimate[9]*covars[i, 6]),
sd=max.llh$estimate[10])/
(w[i]*dnorm(gw.women1$incid[i],
mean=(max.llh$estimate[3]+max.llh$estimate[4]*i/96+max.llh$estimate[8]*covars[i, 5]+
max.llh$estimate[9]*covars[i, 6]),
sd=max.llh$estimate[10]))+
(1-w[i])*dnorm(gw.women1$incid[i],
mean=(max.llh$estimate[3]+max.llh$estimate[4]*i/96+max.llh$estimate[8]*covars[i, 5]+
max.llh$estimate[9]*covars[i, 6])/q,
sd=max.llh$estimate[10]/q)
  post[i, 2] <- (1-w[i])*dnorm(gw.women1$incid[i],
mean=(max.llh$estimate[3]+max.llh$estimate[4]*i/96+max.llh$estimate[8]*covars[i, 5]+

```

SUPPLEMENTARY MATERIAL: Quantifying the under-reporting of uncorrelated longitudinal data: The genital warts example. David Moríña, Amanda Fernández-Fontelo, Alejandra Cabaña, Pedro Puig, Laura Monfil, Maria Brotons and Mireia Diaz

```

max.llh$estimate[9]*covars[i,
6])/q, sd=max.llh$estimate[10]/q)/
(w[i]*dnorm(gw.women1$incid[i],
mean=(max.llh$estimate[3]+max.llh$estimate[4]*i/96+max.llh$estimate[8]*covars[i, 5]+
max.llh$estimate[9]*covars[i, 6]),
sd=max.llh$estimate[10])+
(1-w[i])*dnorm(gw.women1$incid[i],
mean=(max.llh$estimate[3]+max.llh$estimate[4]*i/96+max.llh$estimate[8]*covars[i, 5]+
max.llh$estimate[9]*covars[i, 6])/q,
sd=max.llh$estimate[10]/q))
}
xrec <- ifelse(post[, 2] > 0.5, gw.women1$incid, gw.women1$incid/q)
gw.women1$xrec <- xrec

sum(gw.women1$N.GW)          ### SIDIAP registered
round(sum(gw.women1$xrec*gw.women1$Pob/100000)) ### SIDIAP reconstructed
round(sum(gw.women1$incid*gw.women1$CatPop/100000)) ### Catalonia registered
round(sum(gw.women1$xrec*gw.women1$CatPop/100000)) ### Catalonia reconstructed

### Women 30-94
gw.women2 <- pr4[pr4$sexe==0 & pr4$age==1, ]
### Calculation of the posterior probabilities
post <- matrix(nrow=96, ncol=2)
w <- vector()
for (i in 1:96)
{
w[i] <-
exp(max.llh$estimate[1]+max.llh$estimate[2]*i/96)/(1+exp(max.llh$estimate[1]+max.llh$estimate[
2]*i/96))
post[i, 1] <- w[i]*dnorm(gw.women2$incid[i],
mean=(max.llh$estimate[3]+max.llh$estimate[4]*i/96+max.llh$estimate[5]+
max.llh$estimate[8]*covars[i,
5]+max.llh$estimate[9]*covars[i, 6]), sd=max.llh$estimate[10])/
(w[i]*dnorm(gw.women2$incid[i],
mean=(max.llh$estimate[3]+max.llh$estimate[4]*i/96+max.llh$estimate[5]+max.llh$estimate[8]*cov
ars[i, 5]+
max.llh$estimate[9]*covars[i, 6]),
sd=max.llh$estimate[10])+
(1-w[i])*dnorm(gw.women2$incid[i],
mean=(max.llh$estimate[3]+max.llh$estimate[4]*i/96+max.llh$estimate[5]+max.llh$estimate[8]*cov
ars[i, 5]+
max.llh$estimate[9]*covars[i, 6])/q,
sd=max.llh$estimate[10]/q))
post[i, 2] <- (1-w[i])*dnorm(gw.women2$incid[i],
mean=(max.llh$estimate[3]+max.llh$estimate[4]*i/96+max.llh$estimate[5]+max.llh$estimate[8]*cov
ars[i, 5]+
max.llh$estimate[9]*covars[i,
6])/q, sd=max.llh$estimate[10]/q)/
(w[i]*dnorm(gw.women2$incid[i],
mean=(max.llh$estimate[3]+max.llh$estimate[4]*i/96+max.llh$estimate[5]+max.llh$estimate[8]*cov
ars[i, 5]+
max.llh$estimate[9]*covars[i, 6]),
sd=max.llh$estimate[10])+
(1-w[i])*dnorm(gw.women2$incid[i],
mean=(max.llh$estimate[3]+max.llh$estimate[4]*i/96+max.llh$estimate[5]+max.llh$estimate[8]*cov
ars[i, 5]+
max.llh$estimate[9]*covars[i, 6])/q,
sd=max.llh$estimate[10]/q))
}
xrec <- ifelse(post[,2] > 0.5, gw.women2$incid, gw.women2$incid/q)
gw.women2$xrec <- xrec

sum(gw.women2$N.GW)          ### SIDIAP registered
round(sum(gw.women2$xrec*gw.women2$Pob/100000)) ### SIDIAP reconstructed
round(sum(gw.women2$incid*gw.women2$CatPop/100000)) ### Catalonia registered
round(sum(gw.women2$xrec*gw.women2$CatPop/100000)) ### Catalonia reconstructed

### Men 15-29
gw.men1 <- pr4[pr4$sexe==1 & pr4$age==0, ]
### Calculation of the posterior probabilities
post <- matrix(nrow=96, ncol=2)
w <- vector()
for (i in 1:96)
{
w[i] <-
exp(max.llh$estimate[1]+max.llh$estimate[2]*i/96)/(1+exp(max.llh$estimate[1]+max.llh$estimate[
2]*i/96))

```

SUPPLEMENTARY MATERIAL: Quantifying the under-reporting of uncorrelated longitudinal data: The genital warts example. David Morriña, Amanda Fernández-Fontelo, Alejandra Cabaña, Pedro Puig, Laura Monfil, Maria Brotons and Mireia Diaz

```

    post[i, 1] <- w[i]*dnorm(gw.men1$incid[i],
mean=(max.llh$estimate[3]+max.llh$estimate[4]*i/96+max.llh$estimate[6]+
max.llh$estimate[8]*covars[i,
5]+max.llh$estimate[9]*covars[i, 6]), sd=max.llh$estimate[10])/
(w[i]*dnorm(gw.men1$incid[i],
mean=(max.llh$estimate[3]+max.llh$estimate[4]*i/96+max.llh$estimate[6]+max.llh$estimate[8]*cov
ars[i, 5]+
max.llh$estimate[9]*covars[i, 6]),
sd=max.llh$estimate[10])+
(1-w[i])*dnorm(gw.men1$incid[i],
mean=(max.llh$estimate[3]+max.llh$estimate[4]*i/96+max.llh$estimate[6]+max.llh$estimate[8]*cov
ars[i, 5]+
max.llh$estimate[9]*covars[i, 6])/q,
sd=max.llh$estimate[10]/q))
    post[i, 2] <- (1-w[i])*dnorm(gw.men1$incid[i],
mean=(max.llh$estimate[3]+max.llh$estimate[4]*i/96+max.llh$estimate[6]+max.llh$estimate[8]*cov
ars[i, 5]+
max.llh$estimate[9]*covars[i, 6])/q,
sd=max.llh$estimate[10]/q)/
(w[i]*dnorm(gw.men1$incid[i],
mean=(max.llh$estimate[3]+max.llh$estimate[4]*i/96+max.llh$estimate[6]+max.llh$estimate[8]*cov
ars[i, 5]+
max.llh$estimate[9]*covars[i, 6]),
sd=max.llh$estimate[10])+
(1-w[i])*dnorm(gw.men1$incid[i],
mean=(max.llh$estimate[3]+max.llh$estimate[4]*i/96+max.llh$estimate[6]+max.llh$estimate[8]*cov
ars[i, 5]+
max.llh$estimate[9]*covars[i, 6])/q,
sd=max.llh$estimate[10]/q))
}
xrec <- ifelse(post[,2] > 0.5, gw.men1$incid, gw.men1$incid/q)
gw.men1$xrec <- xrec
sum(gw.men1$N.GW) ### SIDIAP registered
round(sum(gw.men1$xrec*gw.men1$Pob/100000)) ### SIDIAP reconstructed
round(sum(gw.men1$incid*gw.men1$CatPop/100000)) ### Catalonia registered
round(sum(gw.men1$xrec*gw.men1$CatPop/100000)) ### Catalonia reconstructed

### Men 30-94
gw.men2 <- pr4[pr4$sexe==1 & pr4$age==1, ]
### Calculation of the posterior probabilities
post <- matrix(nrow=96, ncol=2)
w <- vector()
for (i in 1:96)
{
  w[i] <-
exp(max.llh$estimate[1]+max.llh$estimate[2]*i/96)/(1+exp(max.llh$estimate[1]+max.llh$estimate[
2]*i/96))
  post[i, 1] <- w[i]*dnorm(gw.men2$incid[i],
mean=(max.llh$estimate[3]+max.llh$estimate[4]*i/96+max.llh$estimate[5]+max.llh$estimate[6]+
max.llh$estimate[7]+max.llh$estimate[8]*covars[i, 5]+max.llh$estimate[9]*covars[i, 6]),
sd=max.llh$estimate[10])/
(w[i]*dnorm(gw.men2$incid[i],
mean=(max.llh$estimate[3]+max.llh$estimate[4]*i/96+max.llh$estimate[5]+max.llh$estimate[6]+
max.llh$estimate[7]+max.llh$estimate[8]*covars[i,
5]+max.llh$estimate[9]*covars[i, 6]), sd=max.llh$estimate[10])+
(1-w[i])*dnorm(gw.men2$incid[i],
mean=(max.llh$estimate[3]+max.llh$estimate[4]*i/96+max.llh$estimate[5]+max.llh$estimate[6]+
max.llh$estimate[7]+max.llh$estimate[8]*covars[i, 5]+max.llh$estimate[9]*covars[i, 6])/q,
sd=max.llh$estimate[10]/q))
  post[i, 2] <- (1-w[i])*dnorm(gw.men2$incid[i],
mean=(max.llh$estimate[3]+max.llh$estimate[4]*i/96+max.llh$estimate[5]+max.llh$estimate[6]+
max.llh$estimate[7]+max.llh$estimate[8]*covars[i, 5]+max.llh$estimate[9]*covars[i, 6])/q,
sd=max.llh$estimate[10]/q)/
(w[i]*dnorm(gw.men2$incid[i],
mean=(max.llh$estimate[3]+max.llh$estimate[4]*i/96+max.llh$estimate[5]+max.llh$estimate[6]+
max.llh$estimate[7]+max.llh$estimate[8]*covars[i,
5]+max.llh$estimate[9]*covars[i, 6]), sd=max.llh$estimate[10])+
(1-w[i])*dnorm(gw.men2$incid[i],
mean=(max.llh$estimate[3]+max.llh$estimate[4]*i/96+max.llh$estimate[5]+max.llh$estimate[6]+
max.llh$estimate[7]+max.llh$estimate[8]*covars[i, 5]+max.llh$estimate[9]*covars[i, 6])/q,
sd=max.llh$estimate[10]/q))
}
xrec <- ifelse(post[,2] > 0.5, gw.men2$incid, gw.men2$incid/q)
gw.men2$xrec <- xrec

```

SUPPLEMENTARY MATERIAL: Quantifying the under-reporting of uncorrelated longitudinal data: The genital warts example. David Moríña, Amanda Fernández-Fontelo, Alejandra Cabaña, Pedro Puig, Laura Monfil, Maria Brotons and Mireia Diaz

```

sum(gw.men2$N.GW)          ### SIDIAP registered
round(sum(gw.men2$xrec*gw.men2$Pob/100000)) ### SIDIAP reconstructed
round(sum(gw.men2$incid*gw.men2$CatPop/100000)) ### Catalonia registered
round(sum(gw.men2$xrec*gw.men2$CatPop/100000)) ### Catalonia reconstructed

4.5.      Table S1 generation
### Construction of Table S1
library(gdata)
library(mixtools)
source("R/llh_covars.R")

### Read the data
dades <- read.xls("Data/GW_ICES_mes_any_edat_dec.xlsx", sheet=1)
vals <- expand.grid(mes_any_problema = unique(dades$mes_any_problema),
                  sexe = unique(dades$sexe), edat_assig_dec = seq(0, 99, 1))
pr <- merge(vals, dades, all=TRUE)
rm(dades, vals)
pr$N.GW[is.na(pr$N.GW)] <- 0
pr$age_cat <- ifelse(pr$edat_assig_dec<=15, 0,
                    ifelse(pr$edat_assig_dec>15 & pr$edat_assig_dec<30, 1,
                            ifelse(pr$edat_assig_dec>=30 & pr$edat_assig_dec<99, 2, 3)))

pr2 <- aggregate(pr$N.GW, by=list(pr$mes_any_problema, pr$sexe, pr$age_cat), FUN=sum)
colnames(pr2) <- c("mes_any_problema", "sexe", "age", "N.GW")
pob <- read.xls("Data/GW_ICES_edat_dec.xlsx", sheet=2)
pob$age_cat <- ifelse(pob$edat_dec<=15, 0,
                    ifelse(pob$edat_dec>15 & pob$edat_dec<30, 1,
                            ifelse(pob$edat_dec>=30 & pob$edat_dec<99, 2, 3)))
pob <- aggregate(pob$N.poblacio.assignada.ICES., by=list(pob$periode, pob$sexe, pob$age_cat),
FUN=sum)
pr2$Year <- as.numeric(substr(pr2$mes_any_problema, 1, 4))
colnames(pob) <- c("Year", "sexe", "age", "Pob")
pr3 <- merge(pr2, pob, by=c("Year", "sexe", "age"))
pr3$incid <- pr3$N.GW/pr3$Pob*100000
rm(pr, pob, pr2)
pr3 <- pr3[order(pr3$sexe, pr3$age, pr3$mes_any_problema), ]
pr3$sexe2[pr3$sexe=="D"] <- 0
pr3$sexe2[pr3$sexe=="H"] <- 1
pr3$sexe <- NULL
colnames(pr3)[length(colnames(pr3))] <- "sexe"
catPop <- read.xls("Data/aec-253.xls")
catPop <- catPop[catPop$Age!="De 0 a 4 anys" & catPop$Age!="De 5 a 9 anys" &
                catPop$Age!="De 10 a 14 anys", ]
catPop$AgeCat[catPop$Age=="De 15 a 19 anys" | catPop$Age=="De 20 a 24 anys" |
              catPop$Age=="De 25 a 29 anys"] <- 1
catPop$AgeCat[catPop$Age!="De 15 a 19 anys" & catPop$Age!="De 20 a 24 anys" &
              catPop$Age!="De 25 a 29 anys"] <- 2
catPop2 <- aggregate(catPop$Pop, by=list(catPop$AgeCat, catPop$Sex, catPop$Year), FUN=sum)
colnames(catPop2) <- c("age", "sexe", "Year", "CatPop")
pr4 <- merge(pr3, catPop2, by=c("age", "sexe", "Year"))
pr4 <- pr4[order(pr4$sexe, pr4$age, pr4$mes_any_problema), ]

### Remove < 15 years old
pr4 <- pr4[pr4$age>0 & pr4$age<3, ]

### Recode age group
pr4$age <- pr4$age-1

### Covariates matrix
t <- rep(seq(1, 96), 4)/96
pr4$inter <- as.numeric(pr4$age)*as.numeric(pr4$sexe)
sint <- sin(2*pi*t/3)
cost <- cos(2*pi*t/3)
covars <- cbind(t, pr4$age, pr4$sexe, pr4$inter, sint, cost)

### Direct estimation via mixtools (initial values provided by epidemiologists)
w0 <- 0.90
q0 <- 0.77
prova <- regmixEM(pr4$incid, covars, lambda=c(w0, (1-w0)),
                 beta=matrix(c(mean(pr4$incid), 0, 0, 0, 0, 0, mean(pr4$incid)/q0, 0, 0,
0, 0, 0, 0), ncol=2, nrow=ncol(covars)+1),
                 sigma=c(sd(pr4$incid), sd(pr4$incid)/q0),
                 k=2, addintercept=TRUE, epsilon=1e-16, maxit=10000)

### Initial values for covariates from linear regression model
linmod <- lm(pr4$incid-covars[, 1]+covars[, 2]+covars[, 3]+covars[, 4]+covars[, 5]+covars[,
6])

```

SUPPLEMENTARY MATERIAL: Quantifying the under-reporting of uncorrelated longitudinal data: The genital warts example. David Moríña, Amanda Fernández-Fontelo, Alejandra Cabaña, Pedro Puig, Laura Monfil, Maria Brotons and Mireia Diaz

```

### Estimates, standard errors and confidence intervals for w and q
max.llh <- nlm(f=llh, p=c(log(prova$lambda[which(prova$beta[1,]==min(prova$beta[1,]))]/(1-
prova$lambda[which(prova$beta[1,]==min(prova$beta[1,]))])),
-0.5, linmod$coefficients,
prova$sigma[which(prova$beta[1,]==min(prova$beta[1,]))],
log((prova$beta[1,which(prova$beta[1,]==min(prova$beta[1,]))])/
prova$beta[1,which(prova$beta[1,]==max(prova$beta[1,]))]))/(1-
prova$beta[1,which(prova$beta[1,]==min(prova$beta[1,]))]))),
data=pr4$incid, covars=covars, hessian=TRUE)

q <- exp(max.llh$estimate[11])/(1+exp(max.llh$estimate[11]))

### Women 16-29
gw.women1 <- pr4[pr4$sexe==0 & pr4$age==0, ]
### Calculation of the posterior probabilities
post <- matrix(nrow=96, ncol=2)
w <- vector()
for (i in 1:96)
{
  w[i] <-
exp(max.llh$estimate[1]+max.llh$estimate[2]*i/96)/(1+exp(max.llh$estimate[1]+max.llh$estimate[
2]*i/96))
  post[i, 1] <- w[i]*dnorm(gw.women1$incid[i],
mean=(max.llh$estimate[3]+max.llh$estimate[4]*i/96+max.llh$estimate[8]*covars[i, 5]+
max.llh$estimate[9]*covars[i, 6]),
sd=max.llh$estimate[10])/
(w[i]*dnorm(gw.women1$incid[i],
mean=(max.llh$estimate[3]+max.llh$estimate[4]*i/96+max.llh$estimate[8]*covars[i, 5]+
max.llh$estimate[9]*covars[i, 6]),
sd=max.llh$estimate[10]))+
(1-w[i])*dnorm(gw.women1$incid[i],
mean=(max.llh$estimate[3]+max.llh$estimate[4]*i/96+max.llh$estimate[8]*covars[i, 5]+
max.llh$estimate[9]*covars[i, 6])/q,
sd=max.llh$estimate[10]/q))
  post[i, 2] <- (1-w[i])*dnorm(gw.women1$incid[i],
mean=(max.llh$estimate[3]+max.llh$estimate[4]*i/96+max.llh$estimate[8]*covars[i, 5]+
max.llh$estimate[9]*covars[i,
6])/q, sd=max.llh$estimate[10]/q)/
(w[i]*dnorm(gw.women1$incid[i],
mean=(max.llh$estimate[3]+max.llh$estimate[4]*i/96+max.llh$estimate[8]*covars[i, 5]+
max.llh$estimate[9]*covars[i, 6]),
sd=max.llh$estimate[10]))+
(1-w[i])*dnorm(gw.women1$incid[i],
mean=(max.llh$estimate[3]+max.llh$estimate[4]*i/96+max.llh$estimate[8]*covars[i, 5]+
max.llh$estimate[9]*covars[i, 6])/q,
sd=max.llh$estimate[10]/q))
}
xrec <- ifelse(post[, 2] > 0.5, gw.women1$incid, gw.women1$incid/q)
gw.women1$xrec <- xrec

gw.women1_ag <- aggregate(list(gw.women1$incid, gw.women1$xrec), by=list(gw.women1$Year),
FUN=mean)
colnames(gw.women1_ag) <- c("Year", "SIDIAP Reg", "SIDIAP Rec")
gw.women1_ag$Diff <- (gw.women1_ag$`SIDIAP Rec`-gw.women1_ag$`SIDIAP
Reg`)/gw.women1_ag$`SIDIAP Reg`*100
round(mean(gw.women1_ag$`SIDIAP Reg`), 2)
round(mean(gw.women1_ag$`SIDIAP Rec`), 2)
round((mean(gw.women1_ag$`SIDIAP Rec`)-mean(gw.women1_ag$`SIDIAP
Reg`))/mean(gw.women1_ag$`SIDIAP Reg`)*100, 2)

### Women >= 30
gw.women2 <- pr4[pr4$sexe==0 & pr4$age==1, ]
### Calculation of the posterior probabilities
post <- matrix(nrow=96, ncol=2)
w <- vector()
for (i in 1:96)
{
  w[i] <-
exp(max.llh$estimate[1]+max.llh$estimate[2]*i/96)/(1+exp(max.llh$estimate[1]+max.llh$estimate[
2]*i/96))
  post[i, 1] <- w[i]*dnorm(gw.women2$incid[i],
mean=(max.llh$estimate[3]+max.llh$estimate[4]*i/96+max.llh$estimate[5]+
max.llh$estimate[8]*covars[i,
5]+max.llh$estimate[9]*covars[i, 6]), sd=max.llh$estimate[10])/

```



SUPPLEMENTARY MATERIAL: Quantifying the under-reporting of uncorrelated longitudinal data: The genital warts example. David Morfiña, Amanda Fernández-Fontelo, Alejandra Cabaña, Pedro Puig, Laura Monfil, Maria Brotons and Mireia Diaz

```

      (w[i]*dnorm(gw.women2$incid[i],
mean=(max.llh$estimate[3]+max.llh$estimate[4]*i/96+max.llh$estimate[5]+max.llh$estimate[8]*cov
ars[i, 5]+
      max.llh$estimate[9]*covars[i, 6]),
sd=max.llh$estimate[10])+
      (1-w[i])*dnorm(gw.women2$incid[i],
mean=(max.llh$estimate[3]+max.llh$estimate[4]*i/96+max.llh$estimate[5]+max.llh$estimate[8]*cov
ars[i, 5]+
      max.llh$estimate[9]*covars[i, 6])/q,
      sd=max.llh$estimate[10]/q))
    post[i, 2] <- (1-w[i])*dnorm(gw.women2$incid[i],
mean=(max.llh$estimate[3]+max.llh$estimate[4]*i/96+max.llh$estimate[5]+max.llh$estimate[8]*cov
ars[i, 5]+
      max.llh$estimate[9]*covars[i,
6])/q, sd=max.llh$estimate[10]/q)/
      (w[i]*dnorm(gw.women2$incid[i],
mean=(max.llh$estimate[3]+max.llh$estimate[4]*i/96+max.llh$estimate[5]+max.llh$estimate[8]*cov
ars[i, 5]+
      max.llh$estimate[9]*covars[i, 6]),
sd=max.llh$estimate[10])+
      (1-w[i])*dnorm(gw.women2$incid[i],
mean=(max.llh$estimate[3]+max.llh$estimate[4]*i/96+max.llh$estimate[5]+max.llh$estimate[8]*cov
ars[i, 5]+
      max.llh$estimate[9]*covars[i, 6])/q,
      sd=max.llh$estimate[10]/q))
  }
xrec <- ifelse(post[,2] > 0.5, gw.women2$incid, gw.women2$incid/q)
gw.women2$xrec <- xrec

gw.women2_ag <- aggregate(list(gw.women2$incid, gw.women2$xrec), by=list(gw.women2$Year),
FUN=mean)
colnames(gw.women2_ag) <- c("Year", "SIDIAP Reg", "SIDIAP Rec")
gw.women2_ag$Diff <- (gw.women2_ag$`SIDIAP Rec`-gw.women2_ag$`SIDIAP
Reg`)/gw.women2_ag$`SIDIAP Reg`*100
round(mean(gw.women2_ag$`SIDIAP Reg`), 2)
round(mean(gw.women2_ag$`SIDIAP Rec`), 2)
round((mean(gw.women2_ag$`SIDIAP Rec`)-mean(gw.women2_ag$`SIDIAP
Reg`))/mean(gw.women2_ag$`SIDIAP Reg`)*100, 2)

### Men 16-29
gw.men1 <- pr4[pr4$sexe==1 & pr4$age==0, ]
### Calculation of the posterior probabilities
post <- matrix(nrow=96, ncol=2)
w <- vector()
for (i in 1:96)
{
  w[i] <-
exp(max.llh$estimate[1]+max.llh$estimate[2]*i/96)/(1+exp(max.llh$estimate[1]+max.llh$estimate[
2]*i/96))
  post[i, 1] <- w[i]*dnorm(gw.men1$incid[i],
mean=(max.llh$estimate[3]+max.llh$estimate[4]*i/96+max.llh$estimate[6]+
      max.llh$estimate[8]*covars[i,
5]+max.llh$estimate[9]*covars[i, 6]), sd=max.llh$estimate[10])/
      (w[i]*dnorm(gw.men1$incid[i],
mean=(max.llh$estimate[3]+max.llh$estimate[4]*i/96+max.llh$estimate[6]+max.llh$estimate[8]*cov
ars[i, 5]+
      max.llh$estimate[9]*covars[i, 6]),
sd=max.llh$estimate[10])+
      (1-w[i])*dnorm(gw.men1$incid[i],
mean=(max.llh$estimate[3]+max.llh$estimate[4]*i/96+max.llh$estimate[6]+max.llh$estimate[8]*cov
ars[i, 5]+
      max.llh$estimate[9]*covars[i, 6])/q,
      sd=max.llh$estimate[10]/q))
    post[i, 2] <- (1-w[i])*dnorm(gw.men1$incid[i],
mean=(max.llh$estimate[3]+max.llh$estimate[4]*i/96+max.llh$estimate[6]+max.llh$estimate[8]*cov
ars[i, 5]+
      max.llh$estimate[9]*covars[i, 6])/q,
      sd=max.llh$estimate[10]/q)/
      (w[i]*dnorm(gw.men1$incid[i],
mean=(max.llh$estimate[3]+max.llh$estimate[4]*i/96+max.llh$estimate[6]+max.llh$estimate[8]*cov
ars[i, 5]+
      max.llh$estimate[9]*covars[i, 6]),
sd=max.llh$estimate[10])+
      (1-w[i])*dnorm(gw.men1$incid[i],
mean=(max.llh$estimate[3]+max.llh$estimate[4]*i/96+max.llh$estimate[6]+max.llh$estimate[8]*cov
ars[i, 5]+
      max.llh$estimate[9]*covars[i, 6])/q,
      sd=max.llh$estimate[10]/q))
  }
}

```

SUPPLEMENTARY MATERIAL: Quantifying the under-reporting of uncorrelated longitudinal data: The genital warts example. David Morriña, Amanda Fernández-Fontelo, Alejandra Cabaña, Pedro Puig, Laura Monfil, Maria Brotons and Mireia Diaz

```

}
xrec <- ifelse(post[,2] > 0.5, gw.men1$incid, gw.men1$incid/q)
gw.men1$xrec <- xrec
gw.men1_ag <- aggregate(list(gw.men1$incid, gw.men1$xrec), by=list(gw.men1$Year), FUN=mean)
colnames(gw.men1_ag) <- c("Year", "SIDIAPI Reg", "SIDIAPI Rec")
gw.men1_ag$Diff <- (gw.men1_ag$`SIDIAPI Rec`-gw.men1_ag$`SIDIAPI Reg`)/gw.men1_ag$`SIDIAPI
Reg`*100
round(mean(gw.men1_ag$`SIDIAPI Reg`), 2)
round(mean(gw.men1_ag$`SIDIAPI Rec`), 2)
round((mean(gw.men1_ag$`SIDIAPI Rec`)-mean(gw.men1_ag$`SIDIAPI Reg`))/mean(gw.men1_ag$`SIDIAPI
Reg`)*100, 2)

### Men >= 30
gw.men2 <- pr4[pr4$sexe==1 & pr4$age==1, ]
### Calculation of the posterior probabilities
post <- matrix(nrow=96, ncol=2)
w <- vector()
for (i in 1:96)
{
  w[i] <-
  exp(max.llh$estimate[1]+max.llh$estimate[2]*i/96)/(1+exp(max.llh$estimate[1]+max.llh$estimate[
2]*i/96))
  post[i, 1] <- w[i]*dnorm(gw.men2$incid[i],
  mean=(max.llh$estimate[3]+max.llh$estimate[4]*i/96+max.llh$estimate[5]+max.llh$estimate[6]+
  max.llh$estimate[7]+max.llh$estimate[8]*covars[i, 5]+max.llh$estimate[9]*covars[i, 6]),
  sd=max.llh$estimate[10])/
  (w[i]*dnorm(gw.men2$incid[i],
  mean=(max.llh$estimate[3]+max.llh$estimate[4]*i/96+max.llh$estimate[5]+max.llh$estimate[6]+
  max.llh$estimate[7]+max.llh$estimate[8]*covars[i, 5]+max.llh$estimate[9]*covars[i, 6]), sd=max.llh$estimate[10])+
  (1-w[i])*dnorm(gw.men2$incid[i],
  mean=(max.llh$estimate[3]+max.llh$estimate[4]*i/96+max.llh$estimate[5]+max.llh$estimate[6]+
  max.llh$estimate[7]+max.llh$estimate[8]*covars[i, 5]+max.llh$estimate[9]*covars[i, 6])/q,
  sd=max.llh$estimate[10]/q))
  post[i, 2] <- (1-w[i])*dnorm(gw.men2$incid[i],
  mean=(max.llh$estimate[3]+max.llh$estimate[4]*i/96+max.llh$estimate[5]+max.llh$estimate[6]+
  max.llh$estimate[7]+max.llh$estimate[8]*covars[i, 5]+max.llh$estimate[9]*covars[i, 6])/q,
  sd=max.llh$estimate[10]/q)/
  (w[i]*dnorm(gw.men2$incid[i],
  mean=(max.llh$estimate[3]+max.llh$estimate[4]*i/96+max.llh$estimate[5]+max.llh$estimate[6]+
  max.llh$estimate[7]+max.llh$estimate[8]*covars[i, 5]+max.llh$estimate[9]*covars[i, 6]), sd=max.llh$estimate[10])+
  (1-w[i])*dnorm(gw.men2$incid[i],
  mean=(max.llh$estimate[3]+max.llh$estimate[4]*i/96+max.llh$estimate[5]+max.llh$estimate[6]+
  max.llh$estimate[7]+max.llh$estimate[8]*covars[i, 5]+max.llh$estimate[9]*covars[i, 6])/q,
  sd=max.llh$estimate[10]/q))
}
xrec <- ifelse(post[,2] > 0.5, gw.men2$incid, gw.men2$incid/q)
gw.men2$xrec <- xrec
gw.men2_ag <- aggregate(list(gw.men2$incid, gw.men2$xrec), by=list(gw.men2$Year), FUN=mean)
colnames(gw.men2_ag) <- c("Year", "SIDIAPI Reg", "SIDIAPI Rec")
gw.men2_ag$Diff <- (gw.men2_ag$`SIDIAPI Rec`-gw.men2_ag$`SIDIAPI Reg`)/gw.men2_ag$`SIDIAPI
Reg`*100
round(mean(gw.men2_ag$`SIDIAPI Reg`), 2)
round(mean(gw.men2_ag$`SIDIAPI Rec`), 2)
round((mean(gw.men2_ag$`SIDIAPI Rec`)-mean(gw.men2_ag$`SIDIAPI Reg`))/mean(gw.men2_ag$`SIDIAPI
Reg`)*100, 2)

```
